# Supplementary material for: Conferring cellulose-degrading ability to Yarrowia lipolytica to facilitate a consolidated bioprocessing approach
Source: PubMed Central journal article supplement (PMC5438512; doi:10.1186/s13068-017-0819-8), 2017-05-19
Supplement: 13068_2017_819_MOESM1_ESM.pdf [file 13068_2017_819_MOESM1_ESM.pdf]

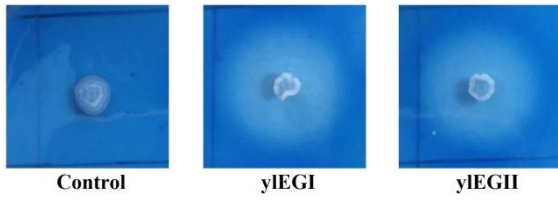

Figure S1 Screening of *Y. lipolytica* expressing EGs on indication plate containing YNBcasa medium supplemented with 0.2% w/v Azo-CM-Cellulose.

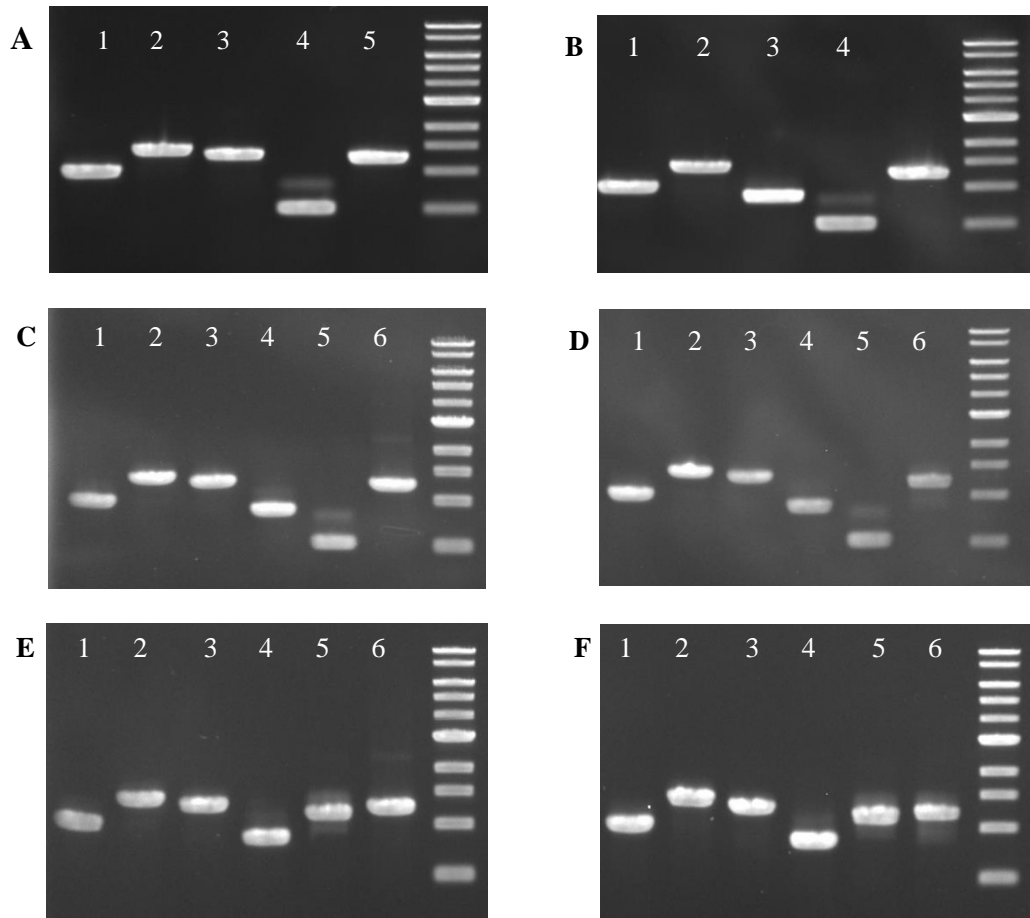

Figure S2 PCR verification of *Y. lipolytica* transformants expressing multiple cellulases (A) YLC1, Lane 1, 2, 3, 4, 5: *BGL1*, *BGL2*, *TrEGI*, *NcCBHI*, *TrCBHII*; (B) YLC2, Lane 1, 2, 3, 4, 5: *BGL1*, *BGL2*, *TrEGII*, *NcCBHI*, *TrCBHII*; (C) YLC3, Lane 1, 2, 3, 4, 5, 6: *BGL1*, *BGL2*, *TrEGI*, *TrEGII*, *NcCBHI*, *TrCBHII*; (D) YLC4, Lane 1, 2, 3, 4, 5, 6: *BGL1*, *BGL2*, *TrEGI*, *TrEGII*, *NcCBHI*, *4UASTrCBHII*; (E) YLC5, Lane 1, 2, 3, 4, 5, 6: *BGL1*, *BGL2*, *TrEGI*, *TrEGII*, *4UASNcCBHI*, *TrCBHII*; (F) YLC6, Lane 1, 2, 3, 4, 5, 6: *BGL1*, *BGL2*, *TrEGI*, *TrEGII*, *4UASNcCBHI*, *4UASTrCBHII*.

Table S1 The sequences of the oligonucleotide primers used for PCR verification of  $\gamma$ 1-transformants

| Primer names | Sequence (5'-3')            |
|--------------|-----------------------------|
| VBGL1A       | TTGACCCAGTAGCGGACCCAA       |
| VBGL1B       | GCCGACATTAGCCCTAACAGCAT     |
| VBGL2A       | GGTTGGCGGCGCATTGT           |
| VBGL2B       | TGTCGTCCACTCGGCTTTCATC      |
| VEGIA        | CACTTGCCGTTAAGGGCGTAGGGT    |
| VEGIB        | CTGGCTGTTGTCGTTCCAAATGCTG   |
| VEGIIA       | CTTGCCGTTAAGGGCGTAGGG       |
| VEGIIB       | CCATCGAGCATAATTGTGGATGTCG   |
| VCBHIA       | TTTGCTTTGTGGTTGGGACTTTAGC   |
| VCBHIB       | GGTTCGAGATCCGATGTTAGTGGAGTA |
| VCBHIIA      | TTTGCTTTGTGGTTGGGACTTTAGCC  |
| VCBHIIIB     | AGGCGTTGGACCAGCCGTA         |
| V4UASCBHIA   | CGCCGCAAGGAATGGTGCA         |
| V4UASCBHIB   | GGTTCGAGATCCGATGTTAGTGGAGTA |
| V4UASCBHIIA  | CGCCGCAAGGAATGGTGCA         |
| V4UASCBHIIIB | CCGATCCGACTGGAGGTACTCTGGTAG |
