# Supplementary material for: Conferring cellulose-degrading ability to Yarrowia lipolytica to facilitate a consolidated bioprocessing approach
Source: PubMed Central journal article supplement (PMC5438512; doi:10.1186/s13068-017-0819-8), 2017-05-19
Supplement: 13068_2017_819_MOESM3_ESM.pdf [file 13068_2017_819_MOESM3_ESM.pdf]

### Nucleotide sequences of constructs

Note that these nucleotide sequences were codon-optimized based on the codon bias of *Y. lipolytica* and are started with prepro sequence of Lip2 of *Y. lipolytica* (underlined)

>*Tr*CBH1

ATGAAGCTTTCCACCATCCTTTTCACAGCCTGCGCTACCCTGGCTGCCGCCCTCCCTTC  
CCCATCACTCCTTCTGAGGCCGCAGTTCTCCAGAAGCGACAGTCGGCCTGCACTCTC  
CAGTCCGAGACCCACCCCTCCCCTGACTTGGCAGAAGTGCTCCTCTGGCGGTACTTGTA  
CCCAGCAGACCGGTTCCGTCGTGATCGACGCTAACTGGCGATGGACTCATGCCACCAA  
CTCGTCCACCAACTGTTACGACGGTAACACTTGGTCTTCGACCCTCTGCCCCGATAACG  
AGACCTGTGCTAAGAAGTGTCTGGACGGAGCCGCTTACGCCTCCACCTACGGAGT  
CACC ACTTCTGGCAACTCCCTCTCTATTGGCTTCGTCACCCAGTCCGCCCAGAAGAAC  
GTGGGTGCTCGACTGTACCTCATGGCCTCTGACACCACTTACCAGGAGTTTACCCTGCT  
CGGTAACGAGTTCTCTTTTGACGTGGATGTTTCGCAGCTGCCCTGCGGTCTCAACGGA  
GCTCTGTACTTCGTTTCCATGGACGCCGATGGAGGCGTCTCTAAGTACCCTACTAACAC  
CGCCGGCGCTAAGTACGGTACCGGATACTGCGACTCTCAGTGTCCCCGAGATCTGAAG  
TTCATCAACGGCCAGGCTAACGTTGAGGGTTGGGAGCCTTCCTCTAACAAACGCCAACA  
CCGGTATTGGTGGACACGGATCTTGCTGTTCCGGAGATGGACATCTGGGAGGCTAACTC  
GATTTCCGAGGCCCTCACCCCTCACCCCTTGCACTGTGGGCCAGGAGATCTGCGAG  
GGCGACGGTTGTGGCGGTACCTACTCCGATAACCGATAACGGAGGCACCTTGGCACCCCG  
ATGGATGTGATTGGAACCCTTACCGACTGGGCAACACCTCTTTCTACGGACCCGGCTC  
GTCCTTTACTCTCGACACCACTAAGAAGCTGACTGTTGTCACCCAGTTCGAGACCTCC  
GGTGCTATTAACCGATACTACGTTACAGAACGGAGTCACCTTTCAGCAGCCCAACGCCG  
AGCTCGGATCTTACTCGGGCAACGAGCTGAACGACGATTACTGCACCGCCGAGGAAG  
CCGAGTTCGGTGGATCTTCGTTTTCCGACAAGGGCGGTCTGACCCAGTTCAAGAAGGC  
TACTTCCGGAGGCATGGTCTCGTGATGTCTGTGGGACGATTACTACGCCAACATGC  
TGTGGCTCGACTCTACTTACCCACCAACGAGACTTCCTCTACCCCTGGTGCCGTCCGA  
GGCTCTGTTCTACCTCGTCCGGTGTGCCCGCTCAGGTTGAGTCGCAGTCCCCTAACG  
CCAAGGTGACCTTCTCTAACATCAAGTTTGGCCCCATTGGTTCCACCGGAAACCCTTCT  
GGTGGAACCCTCCCGGCGGCAACCCTCCCGGAACCACTACCACTCGACGACCCGCT  
ACCACTACCGGCTCTTCTCTGGTCTTACCCAGTCCCACTACGGACAGTGTGGAGGCA  
TTGGATACTCTGGTCTACCGTGTGTGCTTCTGGAACCTACCTGTCAGGTTCTCAACCCT  
TACTACTCTCAGTGTCTGTAA

>*Pc*CBH1

ATGAAGCTTTCCACCATCCTTTTCACAGCCTGCGCTACCCTGGCTGCCGCCCTCCCTTC  
CCCATCACTCCTTCTGAGGCCGCAGTTCTCCAGAAGCGACAGCAGATCGGCACCTAC  
ACTGCCGAGACCCACCCCTCCCCTCTCTTGGTCGACCTGCAAGTCCGGCGGTTCTTGTA  
CCACTAACTCCGGTGCCATTACCCTGGACGCTAACTGGCGATGGGTGCATGGCGTTAAC  
ACCTCTACTAACTGCTACACTGGTAACACCTGGAACCTCGGCCATCTGTGACACCGATGC  
CTCTTGGCGCTCAGGACTGTGCCCTCGACGGTGTGATTACTCCGGCACCTACGGTATTA  
CCACTTCGGGAAACTCCCTGCGACTCAACTTCGTCACCGGCTCGAACGTGGGTTCCTCG  
AACTTACCTGATGGCTGACAACACCCACTACCAGATCTTTGATCTGCTCAACCAGGAG  
TTCACCTTTACTGTGACGTGTCTCATCTGCCCTGCGGACTCAACGGCGCCCTGTACTT

CGTGACCATGGACGCTGATGGAGGCGTTTCCAAGTACCCTAACAACAAGGCCGGCGCT  
CAGTACGGTGTTCGGATACTGCGACTCTCAGTGTCCCCGAGATCTCAAGTTCATCGCCG  
GCCAGGCTAACGTGGAGGGTTGGACCCCTTCCGCCAACACGCTAACACCGGCATTG  
GTAACCACGGAGCCTGCTGTGCTGAGCTGGACATCTGGGAGGCCAACTCCATTTCTGA  
GGCTCTCACTCCCCATCCTTGTGATAACCCCGGTCTGTCTGTCTGCACCACTGACGCCT  
GTGGTGGAACTACTCCTCTGACCGATACTGGAACCTGCGACCCCGATGGCTGTGA  
CTTCAACCCTTACCGACTCGGCGTCACCGACTTTTACGGCTCCGGCAAGACCGTGGAT  
ACCACTAAGCCCTTCACTGTTCGTGACCCAGTTTGTACCAACGACGGAACCTTACTG  
GCTCGCTGTCCGAGATCCGACGATACTACGTCCAGAACGGTGTGTCATTCCCCAGCCT  
TCGTCCAAGATCTCTGGTATTTTCGGGAAACGTGATCAACTCCGACTACTGCGCCGCTGA  
GATTTCCACTTTCGGCGGTACCGCCTCTTTTAAACAAGCACGGAGGCCCTACCAACATG  
GCCGCTGGTATGGAGGCCGGAATGGTTCTCGTCATGTCCCTGTGGGACGATTACGCTGT  
TAACATGCTGTGGCTCGACTCTACTTACCCTACCAACGCTACCGGAACCTCCTGGTGTG  
CTCGAGGTACCTGTGCTACCACTTCCGGAGACCCCAAGACCGTGGAGTCTCAGTCGGG  
ATCTTCGTACGTTACCTTCTCTGATATTCGAGTCGGCCCTTCAACTCTACCTTCTCCGG  
CGGCTCCTCTACCGGCGGTTCTACCACTACCACTGCCTCGGAACCACTACCACTTCTG  
CTTCGTCCACCTCGACTTCTTCGACCTCCACTGGAACCGGAGTGGCTGGACACTGGGG  
ACAGTGTGGAGGCCAGGGTTGGACCGGACCTACCACTTGCCTTCCGGCACCCTTGT  
ACCGTGGTTAACCTTACTACTCTCAGTGTCTGTAA

>NcCBH1

ATGAAGCTTTCACCATCCTTTTCACAGCCTGCGCTACCCTGGCTGCCGCCCTCCCTTC  
CCCCATCACTCCTTCTGAGGCCCGAGTTCTCCAGAAGCGACAGGCCGTCTGCTCCCTG  
ACCGCTGAGACTACCCCTCCCTCAACTGGTCTAAGTGCACCTCCTCTGGTTGTACTAA  
CGTTGCCGGCTCCATACCGTCGACGCTAACTGGCGATGGACCCATATTACTTCTGGAT  
CGACCAACTGTTACTCTGGCAACGAGTGGGACACCTCCCTGTGCTCTACCAACACTGA  
CTGTGCCACCAAGTGTGTGTGGATGGTGTGAGTACTCGTCCACCTACGGCATTGAG  
ACTTCCGGTAACTCCCTGTCTCTCCAGTTCGTTACCAAGGGTTCGTACTCCACTAACAT  
CGGATCTCGAACCTACCTCATGAACGGCGCCGACGCTTACCAGGGATTTGAGCTGCTC  
GGCAACGAGTTCACTTTTGACGTTGATGTCTCTGGAACCGGATGTGGTCTGAACGGTG  
CTCTCTACTTCGTGTCTATGGACCTGGATGGCGGCAAGGCTAAGTACACCAACAACA  
GGCCGGTGCTAAGTACGGAACCGGATACTGTGACGCTCAGTGTCCCCGAGATCTCAAG  
TACATCAACGGCATTGCTAACGTTGAGGGTTGGACCCCTTCTACTAACGACGCCAACG  
CTGGTATCGGAGATCACGGAACCTGCTGTTCCGAGATGGACATTTGGGAGGCCAACAA  
GGTCTCTACCGCTTTCCTACTCCCCACCCCTTGCACTACTATTGAGCAGCATAATGTGCGAGG  
GCGACTCTTGTGGAGGCACCTACTCGGACGACCGATAACGGTGGAACTGCGACGCCGA  
TGGCTGTGACTTCAACTCCTACCGAATGGGTAACACCACTTTTACGGCGAGGGCAAG  
ACCGTTGATACTTCTTCGAAGTTCACCGTTCGTGACTCAGTTTATCAAGGACTCTGCCGG  
AGATCTGGCTGAGATTAAGCGATTTTACGTCCAGAACGGCAAGGTCATCGAGAACTCT  
CAGTCGAACGTCGACGGTGTGTCGGGAACTCCATTACCCAGTCCTTCTGCAACGCC  
AGAAGACCGCTTTCGGTGACATCGACGATTTTAAACAAGAAGGGCGGTCTGAAGCAGAT  
GGGAAAGGCCCTGGCTAAGCCATGGTGTCTGTTATGTCCATTTGGGACGATCACGCC  
GCTAACATGCTGTGGCTCGACTCTACCTACCCCGTGGAGGGAGGCCCTGGTGTACC  
GAGGAGAGTGTCCACCACTTCTGGTGTGCTGCCGAGGTTGAGGCCAACGCTCCCA

ACTCGAAGGTCATCTTCTCCAACATTAAGTTTGGCCCTATCGGTTCTACCTTCTCCGGC  
GGCTCCTCTGGAACCCCTCCCTCCAACCCCTCGTCCTCTGTTAAGCCTGTCACCTCTAC  
TGCCAAGCCCTCGTCCACCTCCACTGCTTCTAACCCCTCTGGAACCGGTGCTGCTCATT  
GGGCTCAGTGTGGCGGTATTGGATTCTCCGGCCCCACCACTTGCCAGTCTCCTTACACC  
TGTCAGAAGATCAACGACTACTACTCCCAGTGTGTGTAA
